# Supplementary material for: A suite of phenotypic assays to ensure pipeline diversity when prioritizing drug-like Cryptosporidium growth inhibitors
Source: PubMed Central journal article supplement (PMC6478823; doi:10.1038/s41467-019-09880-w), 2019-04-23
Supplement: 41467_2019_9880_MOESM1_ESM.pdf [file 41467_2019_9880_MOESM1_ESM.pdf]

## Supplementary Methods

### Supplementary Method 1. ImageJ macro for quantification of DNA synthesis assay.

```
Title = getTitle();
Title = replace>Title, ".tif", "");
run("Stack to Images");
rename ("lectin-"+Title);
selectWindow>Title+"-0001");
rename ("edu-"+Title);
run("Enhance Local Contrast (CLAHE)", "blocksize=9 histogram=256 maximum=3
mask=*None*");
run("Enhance Local Contrast (CLAHE)", "blocksize=9 histogram=256 maximum=3
mask=*None*");
run("Subtract Background...", "rolling=1");
setAutoThreshold("Default dark");
//run("Threshold...");
setThreshold(3000, 65535);
run("Convert to Mask");
selectWindow("lectin-"+Title);
run("Subtract Background...", "rolling=15");
setAutoThreshold("Default dark");
//run("Threshold...");
setThreshold(400, 65535);
run("Convert to Mask");
run("Fill Holes");
run("Watershed");
run("Analyze Particles...", "size=50-Infinity circularity=0.50-1.00 show=[Count Masks]
display clear summarize in_situ");
setAutoThreshold("Default dark");
//run("Threshold...");
setThreshold(0, 0);
run("Create Selection");
selectWindow("edu-"+Title);
run("Restore Selection");
run("Clear", "slice");
run("Select None");
run("Analyze Particles...", "size=3-Infinity circularity=0-1.00 show=Outlines display clear
summarize in_situ");
```

## Supplementary Method 2. ImageJ macro for quantification of DMC1 in the asexual to sexual conversion assay.

```
Title = getTitle();
Title = replace(Title, ".tif", "");
run("Stack to Images");
rename ("nuc-"+Title);
run("Subtract Background...", "rolling=15");
run("Unsharp Mask...", "radius=3 mask=0.70");
//run("Threshold...");
setAutoThreshold("Huang dark");
run("Convert to Mask");
run("Watershed");
run("Analyze Particles...", "size=40-Infinity show=Outlines display clear summarize in_situ");
selectWindow(Title+"-0002");
rename ("lectin-"+Title);
selectWindow(Title+"-0001");
rename ("dmc1-"+Title);
run("Subtract Background...", "rolling=1");
setAutoThreshold("Huang dark");
//run("Threshold...");
setThreshold(373, 16383);
run("Convert to Mask");
run("Fill Holes");
run("Watershed");
selectWindow("lectin-"+Title);
run("Subtract Background...", "rolling=1");
setAutoThreshold("Huang dark");
//run("Threshold...");
setThreshold(1300, 16383);
run("Convert to Mask");
run("Fill Holes");
run("Watershed");
run("Analyze Particles...", "size=2-50 circularity=0.06-1.00 show=[Count Masks] display clear
summarize in_situ");
setAutoThreshold("Huang dark");
//run("Threshold...");
setThreshold(0, 0);
run("Create Selection");
selectWindow("dmc1-"+Title);
run("Restore Selection");
run("Clear", "slice");
run("Select None");
run("Analyze Particles...", "size=0-Infinity circularity=0.5-1.00 show=Outlines display clear
summarize in_situ");
```

```
run("Images to Stack", "name=[] title=[] use");
```

### Supplementary Method 3. Code used for clustering analysis using R studio.

```
#For generating Dendrograms
```

```
##### Relevent Packages and Working Directory #####
```

```
setwd("WORKING DIRECTORY") #working directory
```

```
library(xlsx) #Importing relevant libraries
```

```
library(magrittr)
```

```
library(graphics)
```

```
library(pvclust)
```

```
##### Data Import #####
```

```
comp_df<-data.frame(read.xlsx("FILE NAME.xlsx",  
                             sheetName = "Sheet1", header = TRUE, rowIndex = c(3:42), colIndex =  
c(2:9)))
```

```
names(comp_df)<-c("Name", "Lab Code", "Mechanism", "ID", "Invasion", "DNAsyn",  
"Motility", "SexDiff")
```

```
##### Data Cleaning #####
```

```
##Preparing Data for Dendrograms
```

```
char_list<-vector(mode = "integer", length = 33) #Empty vector to hold count values
```

```
letter_list<-c("A","B","C","D","E","F","G","H","I","J","K",
```

```
"L","M","N","O","P","Q","R","S","T","U","V",
```

```
"W", "X", "Y", "Z", "AA", "AB", "AC", "AD",
```

```
"AE", "AF", "AG") #Possible Groups, this needs additions if more groups emerge
```

```
for(x in comp_df[,3]){ #Counting group ID occurances
```

```
  char_list[which(x == letter_list)] <- char_list[which(x == letter_list)] + 1
```

```
}
```

```
repeated_values<- letter_list[which(char_list > 1)] #List of repeated groups
```

```
i<-1
```

```
for(y in comp_df[,3]){ #IDs compounds belonging to a group
```

```
  if (y %in% repeated_values){
```

```
    comp_df[i,9]<-which(as.character(repeated_values) == as.character(y))
```

```

}else{
  comp_df[i,9]<-0
}
i <- i + 1
}

```

### Graphs Generation ###

```

labelColors = c("#0000FF", "#FF3030", "#228B22", "#D15FEE", "#00CED1", "#8B7355",
"#E67732", "#AD00FA", "#FEFF0E" ) #blue, red, green, orchid, turquoise, brown, purple,
bright yellow

```

```

colLab <<- function(n) { #Function for coloring labels and assigning compound names as
labels
  if(is.leaf(n)) {
    a <- attributes(n)
    attr(n, "nodePar") <-c(a$nodePar, list(lab.col = labelColors[which(repeated_values ==
as.character(comp_df[a$label,3])], lab.font = 2))
    attr(n, "label") <- as.character(comp_df[a$label,1])
  }
  n
}

```

```

cluster_counts<- c(2,3,4,5,6,7) #Number of Clusters

```

```

clust_df=dist(comp_df[,c(5:8)], method = "euclidean") #distance matrix with euclidean values

```

```

dendro_df<-hclust(clust_df,method = "ward.D2")%>% as.dendrogram()

```

##### Scaling Data Frames #####

```

comp_mean<-apply(na.omit(comp_df[5:8]), 2, mean)
comp_sd<-apply(na.omit(comp_df[5:8]), 2, sd)
comp_max<-apply(na.omit(comp_df[5:8]), 2, max)
comp_min<-apply(na.omit(comp_df[5:8]), 2, min)
comp_mad<-apply(na.omit(comp_df[5:8]), 2, mad)

```

```

comp_df_scaled<-data.frame(scale(na.omit(comp_df[5:8]), center = comp_mean, scale =
comp_sd))
comp_df_scaled<-cbind(na.omit(comp_df[which(!is.na(comp_df$DNAsyn)),1]),
comp_df_scaled)

```

```

clust_scaled_dist<-dist(comp_df_scaled, method = "euclidean")

```

```

dendro_scaled_dist<-hclust(clust_scaled_dist, method = "ward.D2") %>% as.dendrogram()

```

```
##### Dendrograms #####
```

```
#margins  
tiff(filename="dendrogram_coloredLabels_30Mar18.tif", width=4000, height=5000,  
units="px", res=600)  
par(mar = c(6,3,1,12))  
plot(dendrapply(dendro_scaled_dist, colLab), horiz = TRUE,  
xlab = "Distance Between Clusters")
```

```
dev.off()
```

```
##### Using the PVClust #####
```

```
par(mar = c(4, 4, 4, 4)) #margins
```

```
comp_df_scaled_rowNames<-comp_df_scaled  
row.names(comp_df_scaled_rowNames)<-comp_df_scaled_rowNames[,1]
```

```
# PVCLUST Package Developed by Ryota Suzuki(a) and Hidetoshi Shimodaira(b)
```

```
# a) Ef-prime, Inc.
```

```
# b) Graduate School of Informatics, Kyoto University
```

```
plot(pvclust(t(comp_df_scaled_rowNames),  
method.hclust = "ward.D2",  
method.dist = "euclidean",  
iseed = 7,  
r = seq(.5, 1.4, by = .1),  
nboot = 10000),  
main = "Using the Data Set Alone \nEuclidean Distance\nWard")
```

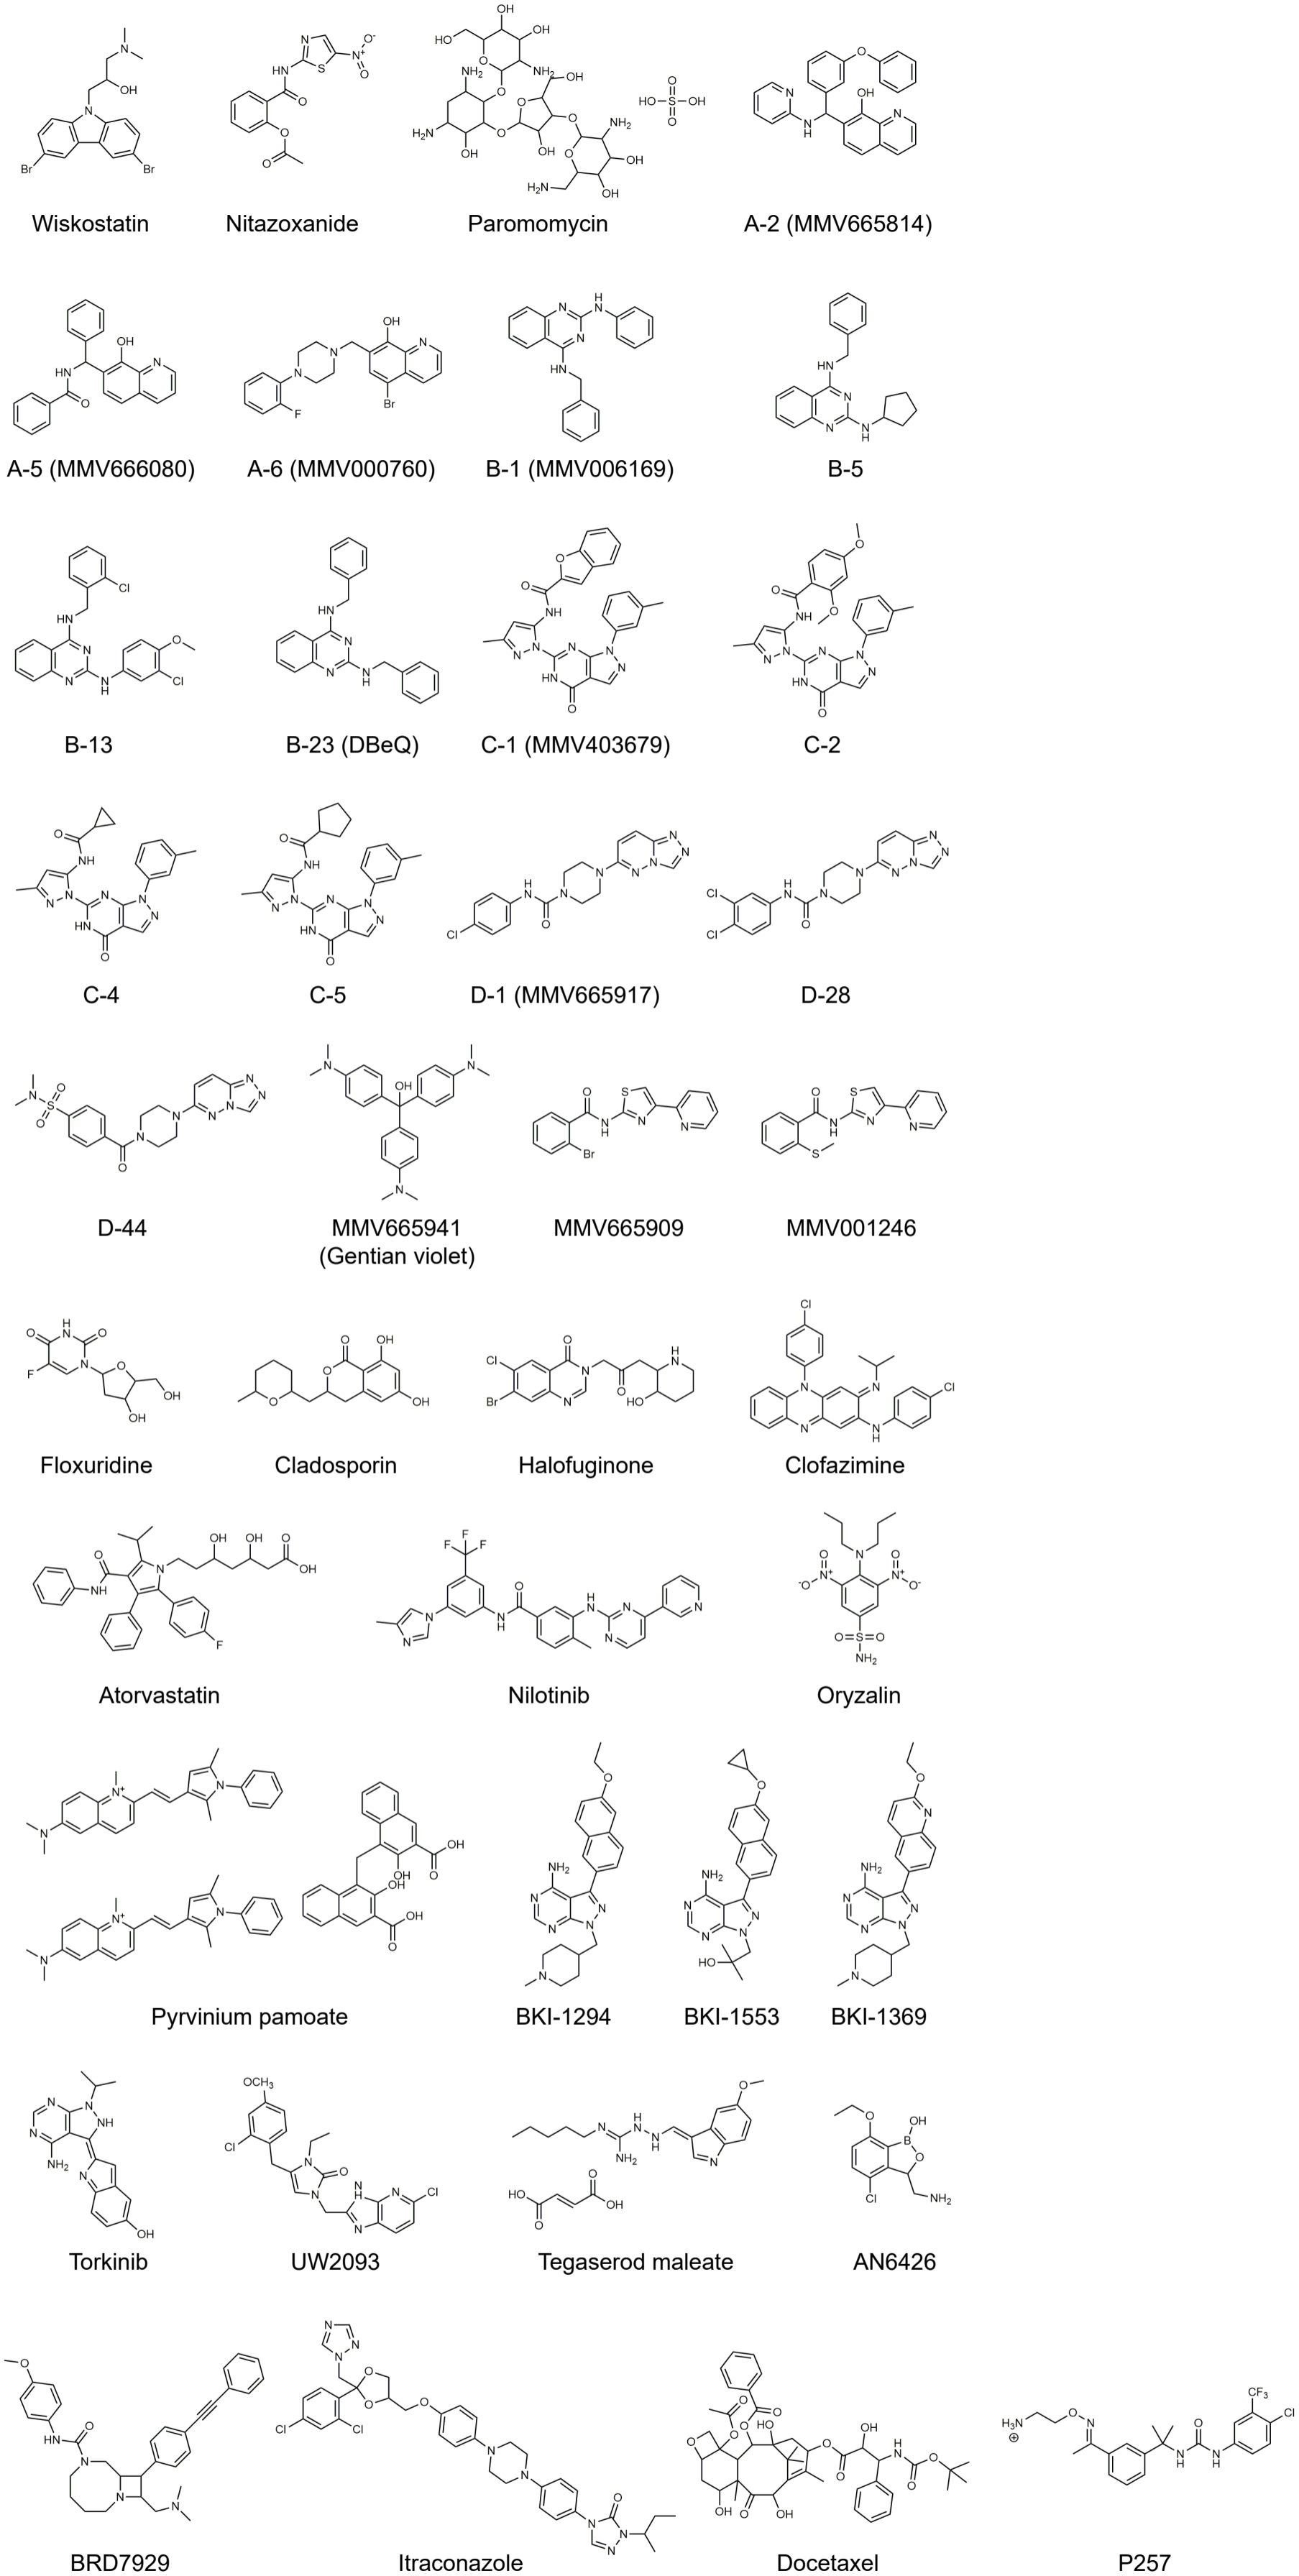

**Supplementary Figure 1: Test set of compounds used for these studies.** In cases where commercially available analogs were purchased (e.g. of compounds from the MMV Malaria Box), lab letter-based codes were established for each compound series. For compounds provided by collaborators, the unique identifiers are given. All of these compounds have previously been publicly disclosed.

Supplementary Table 1. Examples of how several inhibitors group according to phenotypic assay results.

| Scaffold class           | Compound ID | Sporozoite invasion | DNA synthesis | Parasitophorous vacuole ratio (19.5 hour/6 hour) |
|--------------------------|-------------|---------------------|---------------|--------------------------------------------------|
| 2,4-diamino quinazolines | B-1         | yes                 | no            | 1.58                                             |
|                          | B-5         | yes                 | no            | 1.49                                             |
|                          | B-13        | yes                 | no            | 1.42                                             |
|                          | B-23        | yes                 | no            | 1.55                                             |
| Quinolinols              | A-2         | no                  | yes           | 0.69                                             |
|                          | A-5         | no                  | yes           | 0.32                                             |
|                          | A-6         | no                  | yes           | 0.79                                             |
|                          | Floxuridine | no                  | no            | 0.74                                             |
|                          | Tegaserod   | no                  | no            | 1.01                                             |

**Supplementary Table 2:** Compiled assay data for all compounds. Data were generated using compounds at the EC<sub>50</sub> for the axillary growth assay. Each data point represents the mean of at least 2 independent experiments.

| Compound ID                          | Lab Code | Assay Grouping based on mechanism or chemical relatedness | Regulator 3 assay in 48h EC <sub>50</sub> (μM) | Invasion assay (mean % inhibition) | DNA synthesis assay (mean % inhibition) | Egress and invasion (mean PV) (10 <sup>5</sup> cells) | Sexual differentiation (mean % inhibition of DMCI)                                                                                                                                                                                                                                                                                                                                                                                                    | Previously published information on mechanism of action and phenotypic effects, and references.                                                                              |
|--------------------------------------|----------|-----------------------------------------------------------|------------------------------------------------|------------------------------------|-----------------------------------------|-------------------------------------------------------|-------------------------------------------------------------------------------------------------------------------------------------------------------------------------------------------------------------------------------------------------------------------------------------------------------------------------------------------------------------------------------------------------------------------------------------------------------|------------------------------------------------------------------------------------------------------------------------------------------------------------------------------|
|                                      |          |                                                           |                                                |                                    |                                         |                                                       |                                                                                                                                                                                                                                                                                                                                                                                                                                                       |                                                                                                                                                                              |
| 2,4-diaminopyrimidine B-1 (MMV00169) | B-1      | D                                                         | 2.27                                           | 66.43                              | 31.43                                   | 1.68                                                  | 18.08                                                                                                                                                                                                                                                                                                                                                                                                                                                 | C. parvum growth inhibitor; unknown mechanism (Bessoff, et al. 2014. AAC)                                                                                                    |
| 2,4-diaminopyrimidine B-3            | B-3      | D                                                         | 1.39                                           | 82.25                              | 3.46                                    | 1.42                                                  | 11.26                                                                                                                                                                                                                                                                                                                                                                                                                                                 | B-3 analog; unknown mechanism (Bessoff, et al. 2014. AAC)                                                                                                                    |
| 2,4-diaminopyrimidine B-23 (DBaQ)    | B-23     | D                                                         | 10.85                                          | 83.80                              | 1.59                                    | 1.55                                                  | 4.40                                                                                                                                                                                                                                                                                                                                                                                                                                                  | B-1 analog; unknown mechanism (Bessoff, et al. 2014. AAC); previously reported inhibitor of mammalian p97-ATPase and the unfolded protein response (Chou, et al. 2011. PNAS) |
| 2,4-diaminopyrimidine B-5            | B-5      | D                                                         | 7.22                                           | 82.39                              | 0.25                                    | 1.49                                                  | 7.84                                                                                                                                                                                                                                                                                                                                                                                                                                                  | B-1 analog; unknown mechanism (Bessoff, et al. 2014. AAC)                                                                                                                    |
| Alkylpyridol-based C-1 (MMV003679)   | C-1      | G                                                         | 0.65                                           | 10.80                              | 91.44                                   | 0.80                                                  | 30.35                                                                                                                                                                                                                                                                                                                                                                                                                                                 | C. parvum growth inhibitor; unknown mechanism (Bessoff, et al. 2014. AAC)                                                                                                    |
| Alkylpyridol-based C-2               | C-2      | G                                                         | 0.65                                           | 3.65                               | 98.27                                   | 0.38                                                  | 54.99                                                                                                                                                                                                                                                                                                                                                                                                                                                 | C-1 analog; unknown mechanism (Bessoff, et al. 2014. AAC)                                                                                                                    |
| Alkylpyridol-based C-4               | C-4      | G                                                         | 5.17                                           | 9.11                               | 99.18                                   | 0.48                                                  | 64.72                                                                                                                                                                                                                                                                                                                                                                                                                                                 | C-1 analog; unknown mechanism (Bessoff, et al. 2014. AAC)                                                                                                                    |
| Alkylpyridol-based C-5               | C-5      | G                                                         | 4.99                                           | 13.07                              | 88.17                                   | 0.38                                                  | 52.89                                                                                                                                                                                                                                                                                                                                                                                                                                                 | C-1 analog; unknown mechanism (Bessoff, et al. 2014. AAC)                                                                                                                    |
| AM420 (Lys-RS inhibitor)             | H        | 19.51                                                     | 16.44                                          | 68.91                              | 0.23                                    | 62.47                                                 | Lysyl-tRNA synthetase inhibitor previously reported to inhibit C. parvum growth (Palencia, et al. 2016. AAC); presumed Cryptosporidium protein synthesis inhibitor                                                                                                                                                                                                                                                                                    |                                                                                                                                                                              |
| Atorvastatin                         | P        | 2.18                                                      | 38.43                                          | 4.60                               | 1.88                                    | 36.34                                                 | Mammalian HMG-CoA reductase inhibitor; inhibits C. parvum growth by preventing acquisition of host cell lipoprotein precursors (Bessoff, et al. 2013. AAC)                                                                                                                                                                                                                                                                                            |                                                                                                                                                                              |
| B0-1294 (CDPK1 inhibitor)            | L        | 22.40                                                     | 4.64                                           | 6.73                               | 1.49                                    | 45.55                                                 | Calcium-dependent protein kinase (CDPK1) inhibitor with previously demonstrated anticytoprosporal activity in SCID beige mice and the acute PHy knockout mouse infection model (Castellanos-Gonzalez, et al. 2013. JID and Lowe, et al. 2017. PLoS One); additional anticytoprosporal phenotypic effects not documented; B0-1294 inhibits Toxoplasma and Neospora host cell invasion and egress (Winer, et al. 2015. AAC; Ojo, et al. 2014. PLoS One) |                                                                                                                                                                              |
| B01-1588 (CDPK1 inhibitor)           | L        | 17.65                                                     | 7.54                                           | 19.97                              | 1.41                                    | 41.93                                                 | B0-1294 analog with previously demonstrated anticytoprosporal efficacy in zebrafish gillnet model (Lee, et al. 2018. AAC); additional anticytoprosporal phenotypic effects not documented; B0-1294 inhibits Toxoplasma and Neospora host cell invasion and egress (Winer, et al. 2015. AAC; Ojo, et al. 2014. PLoS One)                                                                                                                               |                                                                                                                                                                              |
| B01-1553 (CDPK1 inhibitor)           | L        | 3.49                                                      | 3.92                                           | 9.91                               | 1.94                                    | 31.88                                                 | B0-1294 analog with in vitro anticytoprosporal activity; additional anticytoprosporal phenotypic effects not documented; B0-1294 inhibits Toxoplasma and Neospora host cell invasion and egress (Winer, et al. 2015. AAC; Ojo, et al. 2014. PLoS One)                                                                                                                                                                                                 |                                                                                                                                                                              |
| BFD7019 (Phy-RS inhibitor)           | H        | 0.15                                                      | 5.40                                           | 83.29                              | 0.72                                    | 62.11                                                 | Phenyl-tRNA synthetase inhibitor previously reported to inhibit Plasmodium falciparum growth (Kato, et al. 2016. Nature); presumed Cryptosporidium protein synthesis inhibitor                                                                                                                                                                                                                                                                        |                                                                                                                                                                              |
| Cadospirin (Lysyl-RS inhibitor)      | H        | 0.49                                                      | 4.64                                           | 93.15                              | 0.68                                    | 94.16                                                 | Lysyl-tRNA synthetase and protein synthesis inhibitor with antimetabolic activity (Boepfler, et al. 2012. Cell Host Microbe); presumed Cryptosporidium protein synthesis inhibitor                                                                                                                                                                                                                                                                    |                                                                                                                                                                              |
| Colazone                             | M        | 19.60                                                     | 66.45                                          | 86.68                              | 0.77                                    | 89.18                                                 | Preferentially binds microbial DNA, causing cell cycle disruption; C. parvum growth inhibitor; active in PHy knockout mouse model; inactive in NOD-SCID y mouse model (Lowe, et al. 2017. PLoS One)                                                                                                                                                                                                                                                   |                                                                                                                                                                              |
| Diocteneol                           | T        | 1.00                                                      | 4.83                                           | 16.66                              | 1.79                                    | 37.07                                                 | Mammalian antimetabolic microtubule inhibitor; C. parvum growth inhibitor (Bessoff, et al. 2013. AAC)                                                                                                                                                                                                                                                                                                                                                 |                                                                                                                                                                              |
| Flouxidrine                          | J        | 0.14                                                      | 28.03                                          | 20.42                              | 0.74                                    | 7.53                                                  | Pyrimidine analog; C. parvum growth inhibitor (Bessoff, et al. 2013. AAC)                                                                                                                                                                                                                                                                                                                                                                             |                                                                                                                                                                              |
| Gentian Violet (MMV65841)            | B        | 1.05                                                      | 4.62                                           | 47.40                              | 1.37                                    | 34.34                                                 | Multiple reported mechanisms of action; C. parvum growth inhibitor (Bessoff, et al. 2014. AAC)                                                                                                                                                                                                                                                                                                                                                        |                                                                                                                                                                              |
| Hidifugone (Prolyl-RS inhibitor)     | H        | 0.34                                                      | 6.92                                           | 88.20                              | 0.69                                    | 68.25                                                 | Prolyl-tRNA synthetase inhibitor with in vitro anticytoprosporal activity (Lain, et al. 2017. Structure); presumed Cryptosporidium protein synthesis inhibitor                                                                                                                                                                                                                                                                                        |                                                                                                                                                                              |
| Isoxanazole                          | G        | 7.24                                                      | 29.72                                          | 4.89                               | 1.77                                    | 63.93                                                 | C. parvum growth inhibitor; unknown mechanism (Bessoff, et al. 2013. AAC)                                                                                                                                                                                                                                                                                                                                                                             |                                                                                                                                                                              |
| MMV01246 (AT5-B inhibitor)           | I        | 5.39                                                      | 7.41                                           | 72.11                              | 0.63                                    | 45.46                                                 | Agg II Agg protein-protein interaction inhibitor and Plasmodium growth inhibitor (Pain, et al. 2014. J Med Chem); Toxoplasma replication inhibitor (Vatberg, et al. 2018. AAC); C. parvum growth inhibitor; unknown mechanism (Bessoff, et al. 2014. AAC)                                                                                                                                                                                             |                                                                                                                                                                              |
| MMV65850 (AT5-B inhibitor)           | I        | 6.84                                                      | 12.01                                          | 99.80                              | 0.41                                    | 51.05                                                 | MMV01246 analog. Agg II Agg protein-protein interaction inhibitor and Plasmodium growth inhibitor (Pain, et al. 2014. J Med Chem); Toxoplasma replication inhibitor (Vatberg, et al. 2018. AAC); C. parvum growth inhibitor; unknown mechanism (Bessoff, et al. 2014. AAC)                                                                                                                                                                            |                                                                                                                                                                              |
| Nitrodo                              | U        | 16.54                                                     | 21.68                                          | 22.05                              | 1.05                                    | 72.98                                                 | Mammalian tyrosine kinase inhibitor, including Src/ABL, c-Kit receptor kinase, and platelet-derived growth factor receptor-beta; phenotypic screening hit; unknown anticytoprosporal mechanism.                                                                                                                                                                                                                                                       |                                                                                                                                                                              |
| Nitazoxanide                         | A        | 3.52                                                      | 13.83                                          | 9.18                               | 1.40                                    | 81.79                                                 | Trichomonas vaginalis, Entamoeba histolytica, Giardia intestinalis, Clostridium difficile, Clostridium perfringens, H. pylori, and Campylobacter jejuni pyruvate ferredoxin oxidoreductase inhibitor (Hoffman, et al. 2007. AAC); current standard of care for cryptosporidiosis; anticytoprosporal phenotypic effects not documented; likely inhibits Cryptosporidium growth via an alternate mechanism (Bartlett, et al. 2018. AAC)                 |                                                                                                                                                                              |
| Oxyltin                              | B        | 1.49                                                      | 1.23                                           | 17.01                              | 2.39                                    | 48.24                                                 | Binds Toxoplasma α-Tubulin to disrupt microtubules (Morrisette, et al. 2004. Mol Biol Cell); C. parvum growth inhibitor (Bessoff, et al. 2018. AAC); unknown anticytoprosporal mechanism.                                                                                                                                                                                                                                                             |                                                                                                                                                                              |
| PC27 (IMPDH inhibitor)               | V        | 34.30                                                     | 9.48                                           | 89.76                              | 0.84                                    | 70.52                                                 | Cryptosporidium isozyme monophosphate dehydrogenase inhibitor; efficacious in the acute 1:1 knockout mouse model of cryptosporidiosis (Goff, et al. 2014. AAC)                                                                                                                                                                                                                                                                                        |                                                                                                                                                                              |
| Picomycin                            | R        | 2388.00                                                   | 28.42                                          | 18.81                              | 2.16                                    | 43.80                                                 | C. parvum growth inhibitor; neomycin resistance cassette shown to confer resistance (Vrhayak, et al. 2015. Nature); active in NSG mouse model (Juman, et al. 2018. AAC)                                                                                                                                                                                                                                                                               |                                                                                                                                                                              |
| Piperazine D-1 (MMV665917)           | D-1      | K                                                         | 5.10                                           | 25.16                              | 23.98                                   | 1.66                                                  | 83.01                                                                                                                                                                                                                                                                                                                                                                                                                                                 | C. parvum growth inhibitor; unknown mechanism. Active in NSG mouse model (Juman, et al. 2018. AAC)                                                                           |
| Piperazine D-28                      | R        | K                                                         | 1.50                                           | 13.23                              | 3.38                                    | 1.28                                                  | 81.40                                                                                                                                                                                                                                                                                                                                                                                                                                                 | D-1 analog; in vitro growth inhibitor; unknown mechanism (Juman, et al. 2018. AAC)                                                                                           |
| Piperazine D-44                      | K        | 11.80                                                     | 19.48                                          | 12.07                              | 2.21                                    | 74.35                                                 | D-1 analog; in vitro growth inhibitor; unknown mechanism (Juman, et al. 2018. AAC)                                                                                                                                                                                                                                                                                                                                                                    |                                                                                                                                                                              |
| Prinidazole                          | C        | 3.21                                                      | 25.69                                          | 88.20                              | 0.61                                    | 69.07                                                 | Multiple reported mechanisms of action; previously demonstrated anticytoprosporal activity in neonatal mouse model (Downey, et al. 2008. AAC)                                                                                                                                                                                                                                                                                                         |                                                                                                                                                                              |
| Quinolol A-2 (MMV65814)              | A-2      | N                                                         | 1.34                                           | 15.19                              | 100.00                                  | 0.69                                                  | 36.33                                                                                                                                                                                                                                                                                                                                                                                                                                                 | C. parvum growth inhibitor; unknown mechanism (Bessoff, et al. 2014. AAC)                                                                                                    |
| Quinolol A-3 (MMV65805)              | A-3      | N                                                         | 4.35                                           | 13.46                              | 99.95                                   | 0.32                                                  | 62.35                                                                                                                                                                                                                                                                                                                                                                                                                                                 | A-2 analog. C. parvum growth inhibitor; unknown mechanism (Bessoff, et al. 2014. AAC)                                                                                        |
| Quinolol A-6 (MMV00780)              | A-6      | N                                                         | 1.33                                           | 20.21                              | 89.49                                   | 0.79                                                  | 17.22                                                                                                                                                                                                                                                                                                                                                                                                                                                 | A-2 analog. C. parvum growth inhibitor; unknown mechanism (Bessoff, et al. 2014. AAC)                                                                                        |
| Togastrol                            | F        | 10.32                                                     | 13.93                                          | 6.72                               | 1.01                                    | 12.05                                                 | Mammalian serotonin Type 4 (5-HT <sub>4</sub> ) receptor partial agonist; C. parvum growth inhibitor; unknown anticytoprosporal mechanism (Bessoff, et al. 2013. AAC)                                                                                                                                                                                                                                                                                 |                                                                                                                                                                              |
| Toshibo                              | E        | 0.36                                                      | 21.41                                          | 61.76                              | 1.61                                    | 11.19                                                 | Mammalian mTOR inhibitor; phenotypic screening hit; unknown anticytoprosporal mechanism.                                                                                                                                                                                                                                                                                                                                                              |                                                                                                                                                                              |
| UW2003 (Met-RS inhibitor)            | H        | 0.06                                                      | 9.92                                           | 83.54                              | 1.99                                    | 77.79                                                 | Methionine-tRNA synthetase inhibitor previously reported effective for T. brucei in mice (Shibata, et al. 2011. AAC); presumed Cryptosporidium protein synthesis inhibitor                                                                                                                                                                                                                                                                            |                                                                                                                                                                              |
| UW2003 (MMV1287)                     | G        | 1.34                                                      | 88.86                                          | 76.39                              | 1.84                                    | 42.78                                                 | Mammalian N-WASP inhibitor known to inhibit host cell invasion by C. parvum (Chen, et al. 2004. J Biol Chem)                                                                                                                                                                                                                                                                                                                                          |                                                                                                                                                                              |

EC<sub>50</sub> indicates 50% C. parvum growth inhibitory concentration as measured in the regular 48 h assay (1): Juman Bessoff et al. 2013. AAC.

<sup>1</sup>Unless otherwise noted, anticytoprosporal phenotypic effects more specific than in vitro growth inhibition have not been reported.



**Supplementary Table 3:** Summary of *in vivo* efficacy in NOD SCID Gamma (NSG) mouse model of cryptosporidiosis.

| Compound ID                            | Smiles                                                                                                                                                                                                                | Dose (mg/kg (oral gavage)) | Interval (h) | Duration (days) | Vehicle                                      | NSG mouse efficacy | % reduction in fecal oocyst shedding vs. vehicle control <sup>a</sup> | p-value (student's t-test) |
|----------------------------------------|-----------------------------------------------------------------------------------------------------------------------------------------------------------------------------------------------------------------------|----------------------------|--------------|-----------------|----------------------------------------------|--------------------|-----------------------------------------------------------------------|----------------------------|
| 2,4-diaminoquinazoline B-1 (MMV006169) | <chem>C(Nc1nc(Nc2ccccc2)nc3ccccc13)c4ccccc4</chem>                                                                                                                                                                    | 50.0                       | 12           | 4               | 1% HPMC / 5% DMSO                            | No                 | NA                                                                    |                            |
| 2,4-diaminoquinazoline B-13            | <chem>COc1ccc(cc1Cl)Nc1nc(NC2ccccc2Cl)c2c(n1)cccc2</chem>                                                                                                                                                             | 50.0                       | 12           | 4               | 1% HPMC / 5% DMSO                            | No                 | NA                                                                    |                            |
| 2,4-diaminoquinazoline B-23 (DBeQ)     | <chem>c1ccc(cc1)CNc1nc(NC2ccccc2)c2c(n1)cccc2</chem>                                                                                                                                                                  | -                          | -            | -               | -                                            | ND                 | NA                                                                    |                            |
| 2,4-diaminoquinazoline B-5             | <chem>C1CCC(C1)Nc1nc(NC2ccccc2)c2c(n1)cccc2</chem>                                                                                                                                                                    | 50.0                       | 12           | 4               | 1% HPMC / 5% DMSO                            | No                 | NA                                                                    |                            |
| Allopurinol-based C-1 (MMV403679)      | <chem>c1(c(cnn1c2ccccc(C)C2)C(=O)N3)N=C3n4nc(C)cc4NC(=O)c5cc(cccc6)c6o5</chem>                                                                                                                                        | -                          | -            | -               | -                                            | ND                 | NA                                                                    |                            |
| Allopurinol-based C-2                  | <chem>c31c(cnn1-c2cc(ccc2)C)C(=O)NC(=N3)n4c(cc(n4)C)NC(=O)c5c(cc(cc5)OC)OC</chem>                                                                                                                                     | 100.0                      | 24           | 7               | 1% HPMC / 5% DMSO                            | No                 | NA                                                                    |                            |
| Allopurinol-based C-4                  | <chem>c31c(cnn1-c2cc(ccc2)C)C(=O)NC(=N3)n4c(cc(n4)C)NC(=O)C5CC5</chem>                                                                                                                                                | 100.0                      | 24           | 7               | 1% HPMC / 5% DMSO                            | No                 | NA                                                                    |                            |
| Allopurinol-based C-5                  | <chem>c31c(cnn1-c2cc(ccc2)C)C(=O)NC(=N3)n4c(cc(n4)C)NC(=O)C5CCCC5</chem>                                                                                                                                              | 100.0                      | 24           | 7               | 1% HPMC / 5% DMSO                            | No                 | NA                                                                    |                            |
| AN6426 (Leu-RS inhibitor)              | <chem>OB1OC(CN)C2=C(Cl)C=CC(OCC)=C21</chem>                                                                                                                                                                           | 60.0                       | 24           | 4               | 1% CMC/0.1% Tween                            | No                 | NA                                                                    |                            |
| Atorvastatin                           | <chem>CC(C)C1=C(C(=C(N1CCC(CC(C(=O)O)O)O)C2=CC=C(C=C2)F)C3=CC=CC=C3)C(=O)NC4=CC=CC=C4</chem>                                                                                                                          | 50.0                       | 12           | 7               | 1% HPMC / 5% DMSO                            | No                 | NA                                                                    |                            |
| BKI-1294 (CDPK1 inhibitor)             | <chem>CCOC(C=C1)=CC(C1=C2)=CC=C2C3=NN(CC4CCN(C)CC4)C5=NC=NC(N)=C53</chem>                                                                                                                                             | 100.0                      | 24           | 4               | 5% DMSO 95%[7%Tween80/3%EtOH/90%Saline]      | No                 | NA                                                                    |                            |
| BKI-1369 (CDPK1 inhibitor)             | <chem>CCOC(C=C1)=NC(C1=C2)=CC=C2C3=NN(CC4CCN(C)CC4)C5=NC=NC(N)=C53</chem>                                                                                                                                             | 60.0                       | 24           | 4               | 90% Saline;7% Tween80;3%EtOH                 | Yes                | 90.8%                                                                 | 0.03                       |
| BKI-1553 (CDPK1 inhibitor)             | <chem>NC1=C2C(N(CC(O)(C)C)N=C2C3=CC=C(C=C(OC4CC4)C=C5)C5=C3)=NC=N1</chem>                                                                                                                                             | 10.0                       | 24           | 4               | 90% Saline;7% Tween80;3%EtOH                 | Yes                | 81.2%                                                                 | 0.04                       |
| BRD7929 (Phe-RS inhibitor)             | <chem>CN(C)CC1C(C2N1CCCCN(C2)C(=O)NC3=CC=C(C=C3)OC)C4=CC=C(C=C4)C#CC5=CC=CC=C5</chem>                                                                                                                                 | 10.0                       | 24           | 4               | 0.5% HPMC, 0.5% Tween 80/ 5% DMSO            | Yes                | 99.9%                                                                 | 0.02                       |
| Cladosporin (Lysyl-RS inhibitor)       | <chem>CC1CCCC(O1)CC2CC3=CC(=CC(=C3C(=O)O2)O)O</chem>                                                                                                                                                                  | -                          | -            | -               | -                                            | ND                 | NA                                                                    |                            |
| Clofazimine                            | <chem>CC(C)N=C1C=C2C(=NC3=CC=CC=C3N2C4=CC=C(C=C4)Cl)C=C1NC5=CC=C(C=C5)Cl</chem>                                                                                                                                       | 100.0                      | 24           | 4               | Corn Oil or .5% HPMC, 0.5% Tween 80/ 5% DMSO | No                 | NA                                                                    |                            |
| Docetaxel                              | <chem>CC1=C2C(C(=O)C3(C(C4C(C3C(C(C2(C)C)(CC1OC(=O)C(C(C5=CC=CC=C5)NC(=O)O)C(C)C)O)OC(=O)C6=CC=CC=C6)(CO4)OC(=O)C)O)C)O</chem>                                                                                        | -                          | -            | -               | -                                            | ND                 | NA                                                                    |                            |
| Floxuridine                            | <chem>C1C(C(OC1N2C=C(C(=O)NC2=O)F)CO)O</chem>                                                                                                                                                                         | 200.0                      | 24           | 7               | 1% HPMC / 5% DMSO                            | No                 | NA                                                                    |                            |
| Gentian Violet (MMV665941)             | <chem>CN(C)c1ccc(cc1)C(O)(c2ccc(cc2)N(C)C)c3ccc(cc3)N(C)C</chem>                                                                                                                                                      | 50.0                       | 12           | 4               | 1% HPMC / 5% DMSO                            | No                 | NA                                                                    |                            |
| Halofuginone (Propyl-RS inhibitor)     | <chem>C1CC(C(NC1)CC(=O)CN2C=NC3=CC(=C(C=C3C2=O)Cl)Br)O</chem>                                                                                                                                                         | -                          | -            | -               | -                                            | ND                 | NA                                                                    |                            |
| Itraconazole                           | <chem>CCC(C)N1C(=O)N(C=N1)C2=CC=C(C=C2)N3CCN(CC3)C4=CC=C(C=C4)OCC5COC(O5)(CN6C=NC=N6)C7=C(C=C(C=C7)Cl)Cl</chem>                                                                                                       | 50.0                       | 12           | 7               | 1% HPMC / 5% DMSO                            | No                 | NA                                                                    |                            |
| MMV001246 (ATG-8 inhibitor)            | <chem>CSc1ccccc1C(=O)Nc2nc(cs2)c3cccn3</chem>                                                                                                                                                                         | 50.0                       | 12           | 4               | 1% HPMC / 5% DMSO                            | No                 | NA                                                                    |                            |
| MMV665909 (ATG-8 inhibitor)            | <chem>Brc1ccccc1C(=O)Nc2nc(cs2)c3cccn3</chem>                                                                                                                                                                         | 50.0                       | 12           | 4               | 1% HPMC / 5% DMSO                            | No                 | NA                                                                    |                            |
| Nilotinib                              | <chem>Cc1nncn(c1)c1cc(NC(=O)c2ccc(C)c(Nc3ncccc(n3)c3cccn3)c2)cc(c1)C(F)(F)F</chem>                                                                                                                                    | 42.0                       | 8            | 4               | 90% Saline;7% Tween80;3%EtOH                 | No                 | NA                                                                    |                            |
| Nitazoxanide                           | <chem>CC(=O)OC1=CC=CC=C1C(=O)NC2=NC=C(S2)[N+](=O)[O-]</chem>                                                                                                                                                          | 200.0                      | 24           | 7               | 1% HPMC / 5% DMSO                            | No                 | NA                                                                    |                            |
| Oryzalin                               | <chem>CCCN(CCC)C1=C(C=C(C=C1[N+](=O)[O-])S(=O)(=O)N)[N+](=O)[O-]</chem>                                                                                                                                               | -                          | -            | -               | -                                            | ND                 | NA                                                                    |                            |
| P257 (IMPDH inhibitor)                 | <chem>[NH3+]C(CO)N=C(C1=CC=CC(C(C)C)NC(NC2=CC=C(C)C(C(F)(F)F)=C2)O)=C1)C</chem>                                                                                                                                       | 83.0                       | 8            | 4               | 90% Saline;7% Tween80;3%EtOH                 | No                 | NA                                                                    |                            |
| Paromomycin                            | <chem>C1C(C(C(C(C1N)OC2C(C(C(C(O2)CO)O)O)N)OC3C(C(C(O3)CO)OC4C(C(C(C(O4)CN)O)O)O)N.OS(=O)(=O)O</chem>                                                                                                                 | 2000.0                     | 24           | 4               | 1% HPMC / 5% DMSO                            | Yes                | 92.9%                                                                 | 0.03                       |
| Piperazine D-1 (MMV665917)             | <chem>Clc1ccc(NC(=O)N2CCN(CC2)c3cc4nncn4n3)cc1</chem>                                                                                                                                                                 | 30.0                       | 12           | 4               | 1% HPMC / 5% DMSO                            | Yes                | 98.9%                                                                 | 0.01                       |
| Piperazine D-28                        | <chem>O=C(N1CCN(CC1)c1ccc2n(n1)cnn2)Nc1ccc(c(c1)Cl)Cl</chem>                                                                                                                                                          | 60.0                       | 12           | 4               | 1% HPMC / 5% DMSO                            | Yes                | 99.9%                                                                 | 0.01                       |
| Piperazine D-44                        | <chem>O=C(c1ccc(cc1)S(=O)(=O)N(C)C)N1CCN(CC1)c1ccc2n(n1)cnn2</chem>                                                                                                                                                   | -                          | -            | -               | -                                            | ND                 | NA                                                                    |                            |
| Pyrvinium pamoate                      | <chem>CN(C1=CC2=CC=C([N+](C)=C2C=C1)/C=C/C3=C(N(C4=CC=CC=C4)C(C)=C3)C)C.CN(C5=CC6=CC=C([N+](C)=C6C=C5)/C=C/C7=C(N(C8=CC=CC=C8)C(C)=C7)C)C.OCC9=CC%10=CC=CC=C%10C(CC%11=C%12C=CC=CC%12=CC(C(O)=O)=C%11O)=C9O)=O</chem> | 2.5                        | 12           | 7               | 1% HPMC / 5% DMSO                            | No                 | NA                                                                    |                            |
| Quinololinol A-2 (MMV665814)           | <chem>Oc1c(ccc2ccnc12)C(Nc3ccccc3)c4cccc(Oc5ccccc5)c4</chem>                                                                                                                                                          | 50.0                       | 12           | 4               | 1% HPMC / 5% DMSO                            | No                 | NA                                                                    |                            |
| Quinololinol A-5 (MMV666080)           | <chem>Oc1c(ccc2ccnc12)C(NC(=O)c3ccccc3)c4cccc4</chem>                                                                                                                                                                 | 50.0                       | 12           | 4               | 1% HPMC / 5% DMSO                            | No                 | NA                                                                    |                            |
| Quinololinol A-6 (MMV000760)           | <chem>Oc1c(CN2CCN(CC2)c3ccccc3F)cc(Br)c4cccn4</chem>                                                                                                                                                                  | -                          | -            | -               | -                                            | ND                 | NA                                                                    |                            |
| Tegaserod                              | <chem>CCCCCN=C(N)NNC=C1C=NC2=C1C=C(C=C2)OC.C(=CC(=O)O)C(=O)O</chem>                                                                                                                                                   | 200.0                      | 24           | 7               | 1% HPMC / 5% DMSO                            | No                 | NA                                                                    |                            |
| Torkinib                               | <chem>CC(C)N1C2=C(C(=C3C=C4C=C(C=CC4=N3)O)N1)C(=NC=N2)N</chem>                                                                                                                                                        | 42.0                       | 8            | 4               | 90% Saline;7% Tween80;3%EtOH                 | No                 | NA                                                                    |                            |
| UW2093 (Met-RS inhibitor)              | <chem>ClC1=CC([CH3]=O)=CC=C1CC(N2CC)=CN(CC3=NC(C=CC(C)N4)=C4N3)C2=O</chem>                                                                                                                                            | 50.0                       | 12           | 4               | 1%HMC 0.5% Tween80                           | Yes                | 94.6%                                                                 | 0.03                       |
| Wiskostatin (MMV672987)                | <chem>OC(CN(C)C)CN1C2=CC=C(Br)C=C2C3=C1C=CC(Br)=C3</chem><br><chem>OR BrC(C=C3)=CC1=C3N(CC(O)CN(C)C)C2=C1C=C(Br)C=C2</chem><br><chem>OR CN(C)CC(CN1C2=C(C=C(C=C2)Br)C3=C1C=CC(=C3)Br)O</chem>                         | 30.0                       | 12           | 4               | 1% HPMC / 5% DMSO                            | No                 | NA                                                                    |                            |

EC<sub>90</sub>, indicates 90% *C. parvum* growth inhibitory concentration as measured in the regular 48 h assay (1) - citation Bessoff et al. 2013 AAC

HPMC, hydroxypropyl methyl cellulose

ND, not done

<sup>a</sup> As determined by qPCR on fecal samples on the day after completing treatment.

## Supplementary References:

1. Bessoff, K. et al. Identification of *Cryptosporidium parvum* active chemical series by Repurposing the open access malaria box. *Antimicrob Agents Chemother* **58**, 2731-9 (2014).
2. Chou, T.F. et al. Reversible inhibitor of p97, DBE1, impairs both ubiquitin-dependent and autophagic protein clearance pathways. *Proceedings of the National Academy of Sciences of the United States of America* **108**, 4834-9 (2011).
3. Palencia, A. et al. *Cryptosporidium* and *Toxoplasma* Parasites Are Inhibited by a Benzoxaborole Targeting Leucyl-tRNA Synthetase. *Antimicrob Agents Chemother* **60**, 5817-27 (2016).
5. Bessoff, K., Sateriale, A., Lee, K.K. & Huston, C.D. Drug repurposing screen reveals FDA-approved inhibitors of human HMG-CoA reductase and isoprenoid synthesis that block *Cryptosporidium parvum* growth. *Antimicrob Agents Chemother* **57**, 1804-14 (2013).
6. Castellanos-Gonzalez, A. et al. A novel calcium-dependent protein kinase inhibitor as a lead compound for treating cryptosporidiosis. *J Infect Dis* **208**, 1342-8 (2013).
7. Love, M.S. et al. A high-throughput phenotypic screen identifies clofazimine as a potential treatment for cryptosporidiosis. *PLoS Negl Trop Dis* **11**, e0005373 (2017).
8. Winzer, P. et al. In Vitro and In Vivo Effects of the Bumped Kinase Inhibitor 1294 in the Related Cyst-Forming Apicomplexans *Toxoplasma gondii* and *Neospora caninum*. *Antimicrob Agents Chemother* **59**, 6361-74 (2015).
9. Ojo, K.K. et al. *Neospora caninum* calcium-dependent protein kinase 1 is an effective drug target for neosporosis therapy. *PLoS One* **9**, e92929 (2014).
11. Lee, S. et al. Therapeutic Efficacy of Bumped Kinase Inhibitor 1369 in a Pig Model of Acute Diarrhea Caused by *Cryptosporidium hominis*. *Antimicrob Agents Chemother* **62**(2018).
13. Kato, N. et al. Diversity-oriented synthesis yields novel multistage antimalarial inhibitors. *Nature* **538**, 344-349 (2016).
14. Hoepfner, D. et al. Selective and specific inhibition of the *Plasmodium falciparum* lysyl-tRNA synthetase by the fungal secondary metabolite cladosporin. *Cell Host Microbe* **11**, 654-63 (2012).
15. Jain, V. et al. Targeting Prolyl-tRNA Synthetase to Accelerate Drug Discovery against Malaria, Leishmaniasis, Toxoplasmosis, Cryptosporidiosis, and Coccidiosis. *Structure* **25**, 1495-1505 e6 (2017).
16. Hain, A.U. et al. Identification of an Atg8-Atg3 protein-protein interaction inhibitor from the medicines for Malaria Venture Malaria Box active in blood and liver stage *Plasmodium falciparum* parasites. *J Med Chem* **57**, 4521-31 (2014).
17. Varberg, J.M., LaFavers, K.A., Arrizabalaga, G. & Sullivan, W.J., Jr. Characterization of *Plasmodium* Atg3-Atg8 Interaction Inhibitors Identifies Novel Alternative Mechanisms of Action in *Toxoplasma gondii*. *Antimicrob Agents Chemother* **62**(2018).
18. Hoffman, P.S. et al. Antiparasitic drug nitazoxanide inhibits the pyruvate oxidoreductases of *Helicobacter pylori*, selected anaerobic bacteria and parasites, and *Campylobacter jejuni*. *Antimicrobial agents and chemotherapy* **51**, 868-76 (2007).
19. Bartelt, L.A. et al. Amixicile Reduces Severity of Cryptosporidiosis but Does Not Have In Vitro Activity against *Cryptosporidium*. *Antimicrob Agents Chemother* **62**(2018).
20. Morrisette, N.S., Mitra, A., Sept, D. & Sibley, L.D. Dinitroanilines bind alpha-tubulin to disrupt microtubules. *Mol Biol Cell* **15**, 1960-8 (2004).

21. Benbow, J.W., Bernberg, E.L., Korda, A. & Mead, J.R. Synthesis and evaluation of dinitroanilines for treatment of cryptosporidiosis. *Antimicrob Agents Chemother* **42**, 339-43 (1998).
22. Gorla, S.K. et al. Validation of IMP dehydrogenase inhibitors in a mouse model of cryptosporidiosis. *Antimicrob Agents Chemother* **58**, 1603-14 (2014).
23. Vinayak, S. et al. Genetic modification of the diarrhoeal pathogen *Cryptosporidium parvum*. *Nature* **523**, 477-80 (2015).
24. Jumani, R.S. et al. A novel piperazine-based drug lead for cryptosporidiosis from the Medicines for Malaria Venture open access Malaria Box. *Antimicrob Agents Chemother* **62**, e01505-01517 (2018).
25. Downey, A.S., Chong, C.R., Graczyk, T.K. & Sullivan, D.J. Efficacy of pyrvinium pamoate against *Cryptosporidium parvum* infection in vitro and in a neonatal mouse model. *Antimicrob Agents Chemother* **52**, 3106-12 (2008).
27. Shibata, S. et al. Selective inhibitors of methionyl-tRNA synthetase have potent activity against *Trypanosoma brucei* Infection in Mice. *Antimicrob Agents Chemother* **55**, 1982-9 (2011).
28. Chen, X.-M. et al. Cdc42 and the Actin-Related Protein/Neural Wiskott-Aldrich Syndrome Protein Network Mediate Cellular Invasion by *Cryptosporidium parvum*. *Infection and immunity* **72**, 3011-3021 (2004).
