# Supplementary material for: A suite of phenotypic assays to ensure pipeline diversity when prioritizing drug-like Cryptosporidium growth inhibitors
Source: PubMed Central journal article supplement (PMC6478823; doi:10.1038/s41467-019-09880-w), 2019-04-23
Supplement: 41467_2019_9880_MOESM3_ESM.pdf [file 41467_2019_9880_MOESM3_ESM.pdf]

## **Description of Additional Supplementary Files**

File Name: Supplementary Movie 1

Description: Time-lapse light microscopy showing parasitophorous vacuole rupture with egress of *C. parvum* and formation of new parasitophorous vacuoles.

File Name: Supplementary Movie 2

Description: Time-lapse light microscopy showing the effect of DMSO (negative control) on rupture and formation of *C. parvum* parasitophorous vacuoles vs. time. Several vacuoles are observed rupturing, with formation of 2-3 smaller vacuoles nearby.

File Name: Supplementary Movie 3

Description: Time-lapse light microscopy showing the effect of compound C-1 (positive control) on rupture and formation of *C. parvum* parasitophorous vacuoles vs. time. No vacuole rupture or new vacuole formation is observed in the presence of C-1.
